# Supplementary material for: Discovery of cell-type specific DNA motif grammar in cis-regulatory elements using random Forest
Source: PubMed Central journal article supplement (PMC5780765; doi:10.1186/s12864-017-4340-z), 2018-01-19

-log<sub>10</sub> P-value distribution of the peaks on the TCF7L2 dataset

**HCT-116**

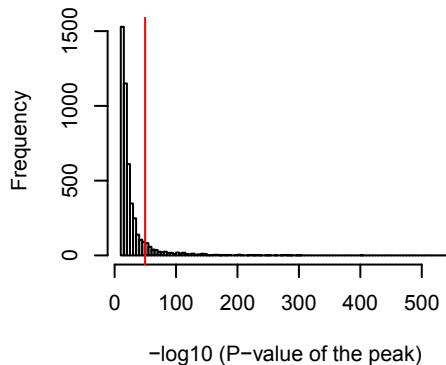

**HEK293**

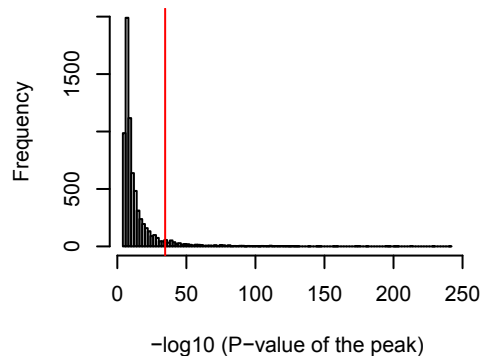

**HeLa-S3**

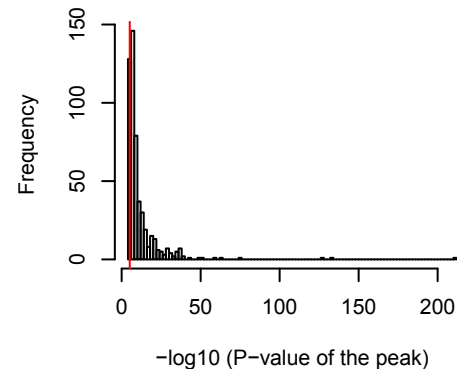

**HepG2**

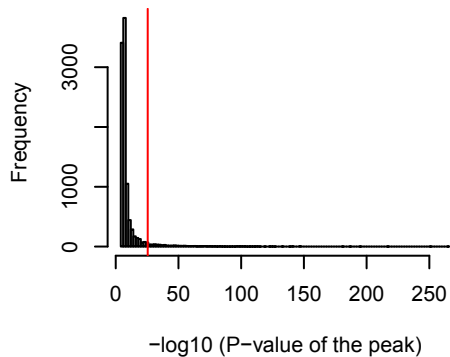

**MCF-7**

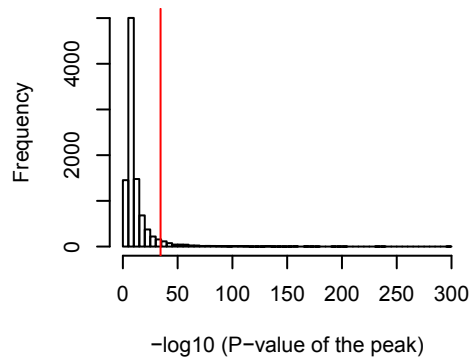

**PANC-1**

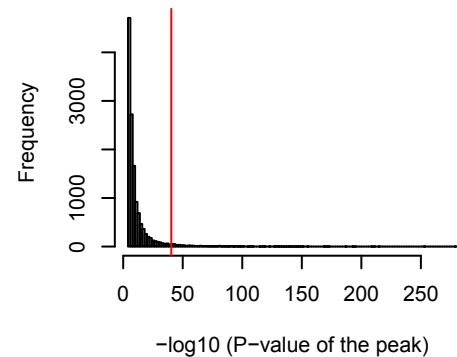

-log<sub>10</sub> P-value distribution of the peaks on the MAX dataset

**A549**

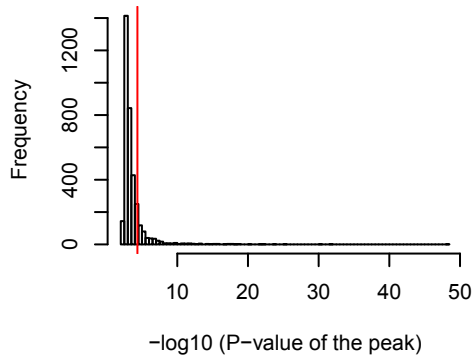

**GM12878**

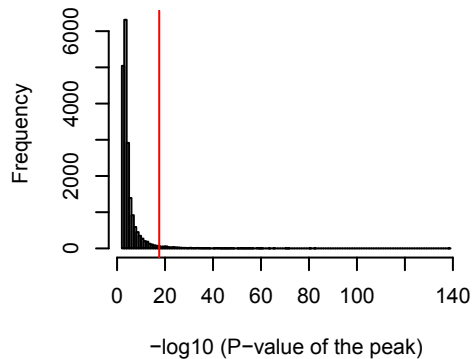

**HeLa-S3**

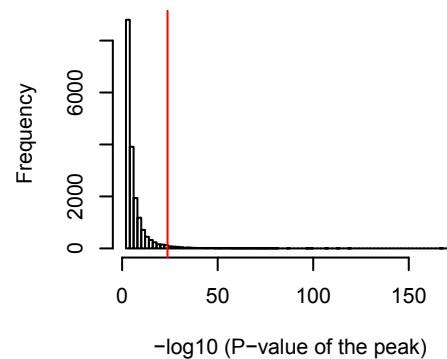

**HepG2**

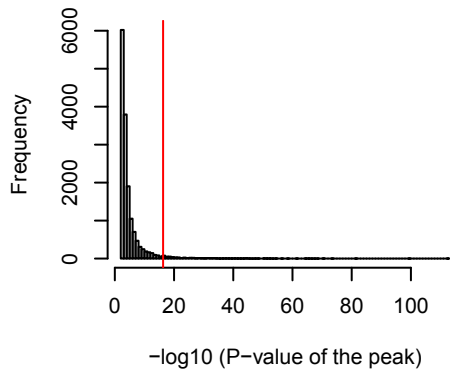

**K562**

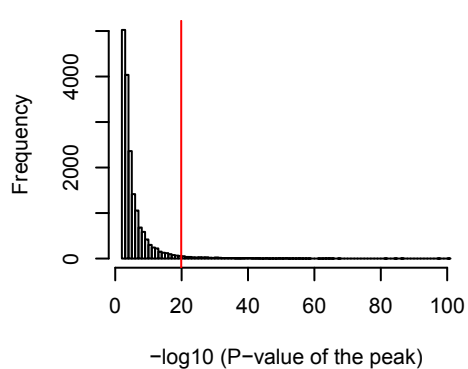

Supplement: 12864_2017_4340_MOESM2_ESM.pdf [file 12864_2017_4340_MOESM2_ESM.pdf]
