# Supplementary material for: Discovery of cell-type specific DNA motif grammar in cis-regulatory elements using random Forest
Source: PubMed Central journal article supplement (PMC5780765; doi:10.1186/s12864-017-4340-z), 2018-01-19

# 10 times 10-folds Cross-Validation of the TCF7L2 dataset

## HCT-116

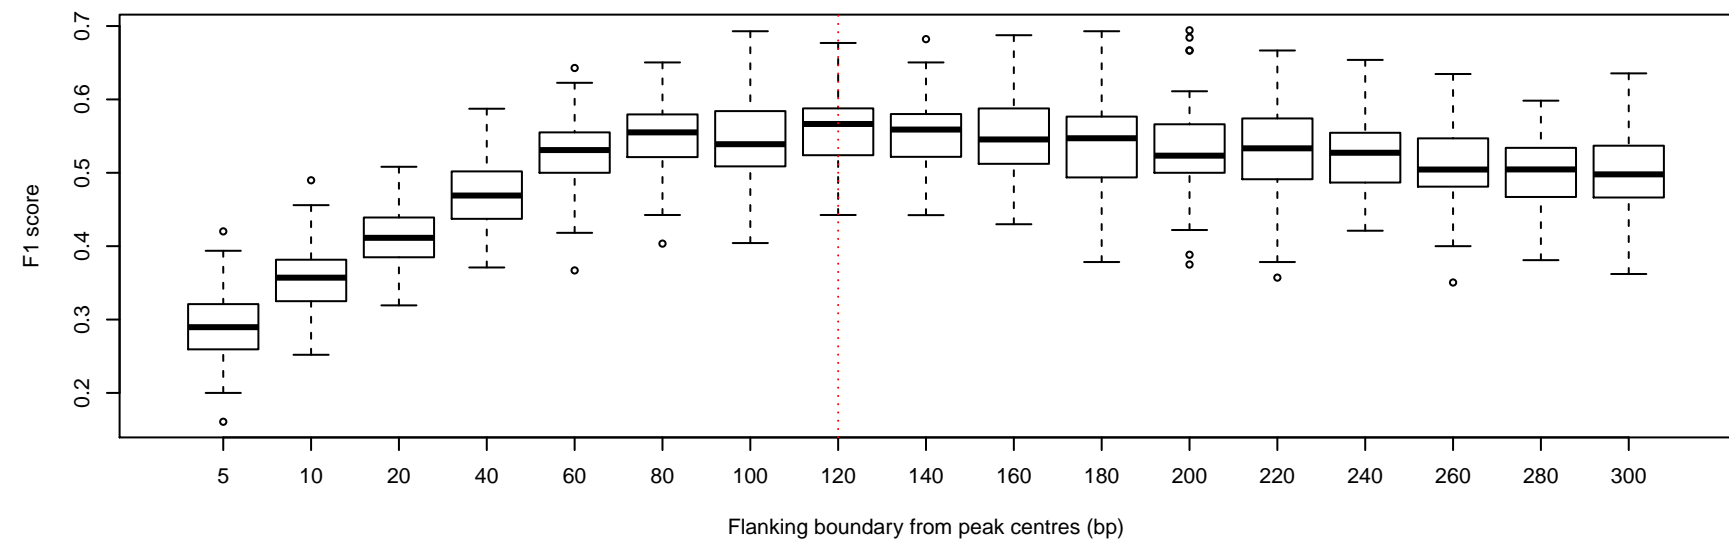

## HEK293

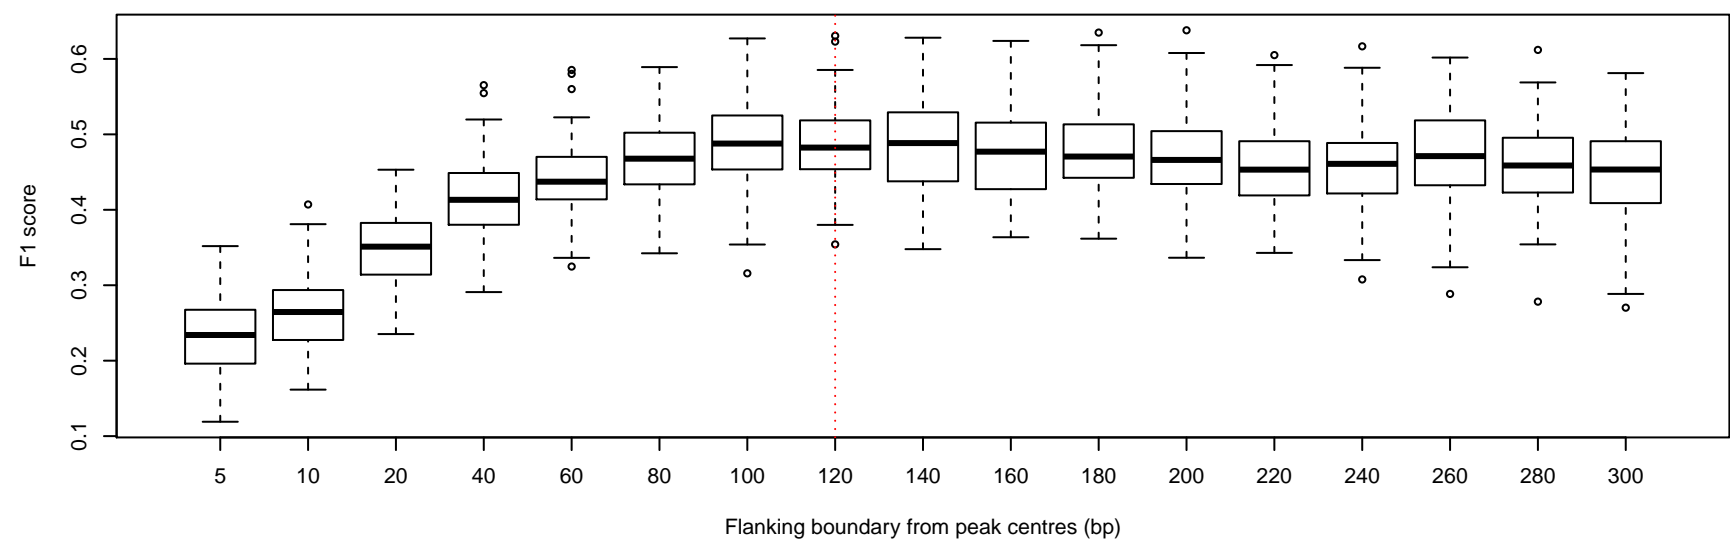

## HeLa-S3

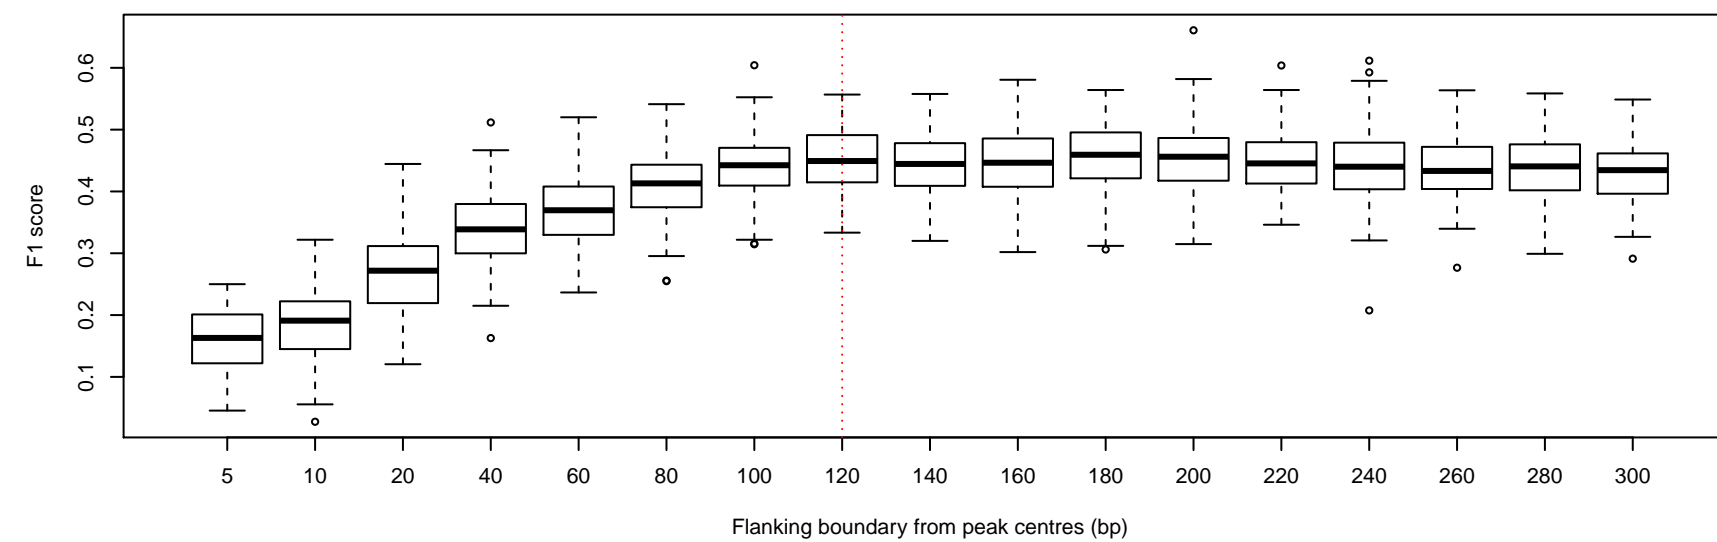

## HepG2

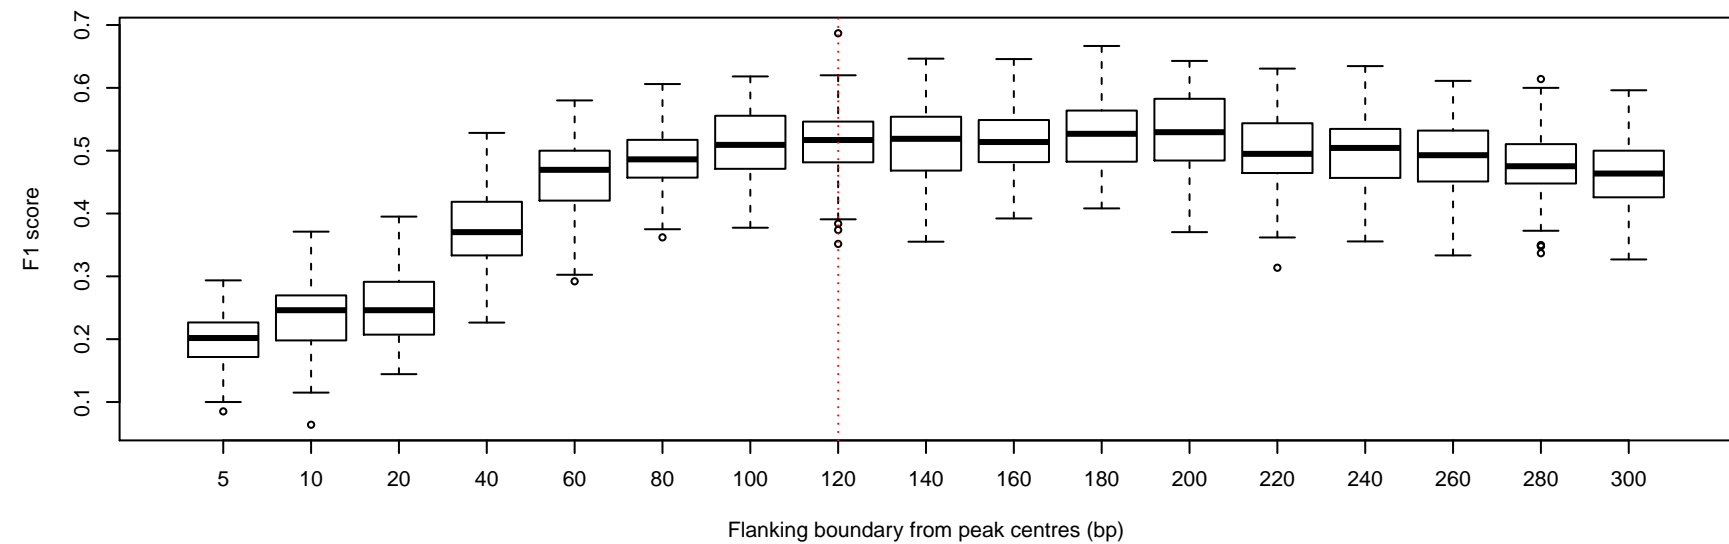

## MCF-7

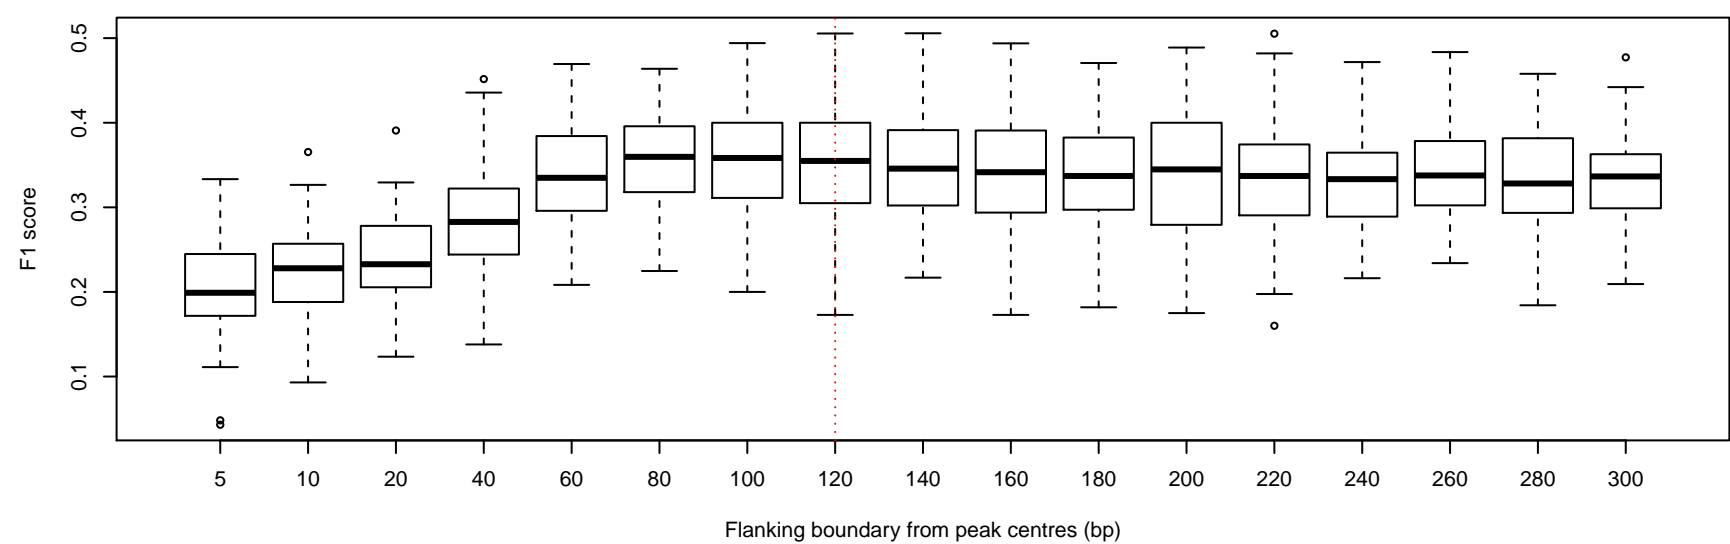

## PANC-1

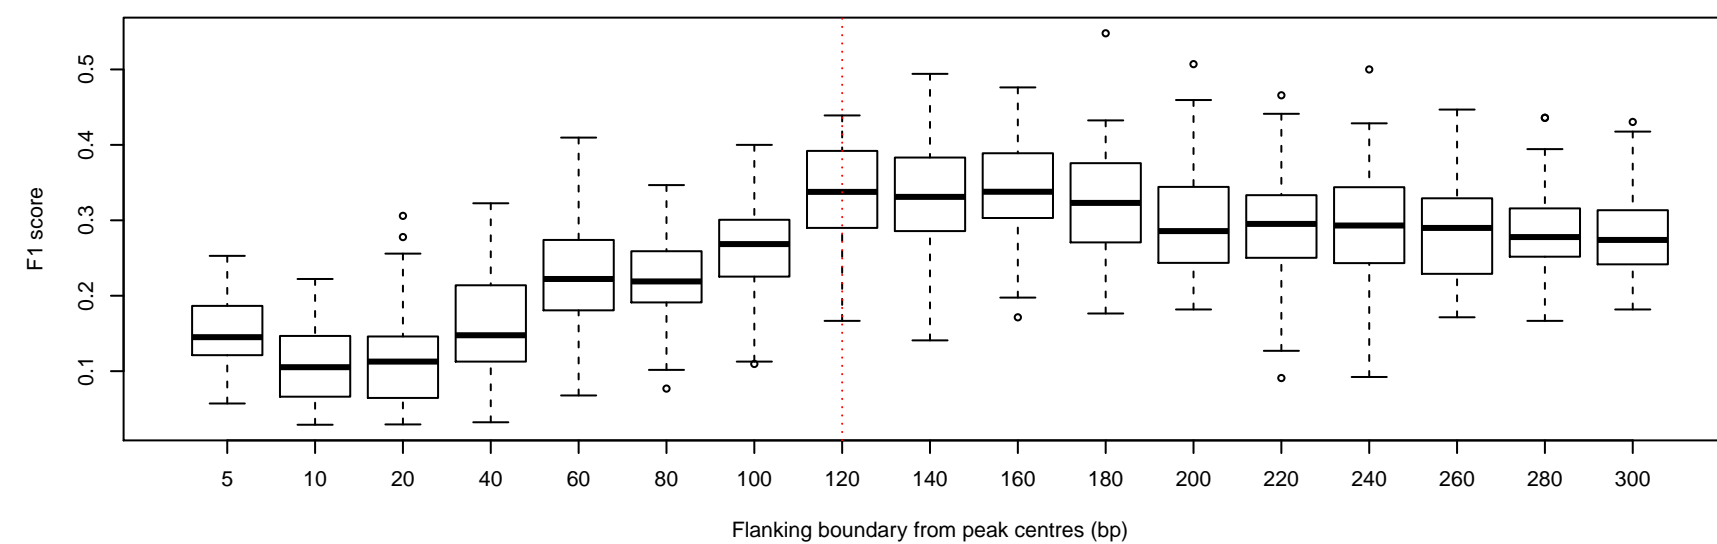

# 10 times 10-folds Cross-Validation of the MAX dataset

## A549

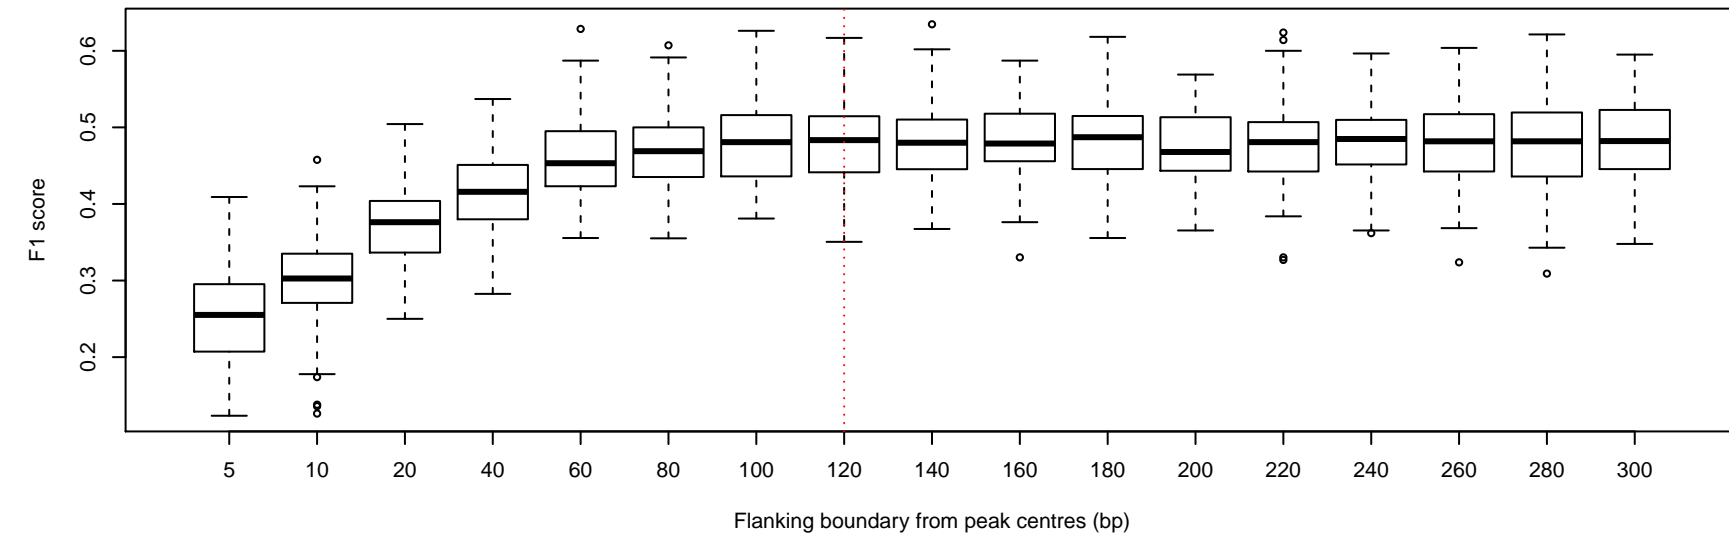

## GM12878

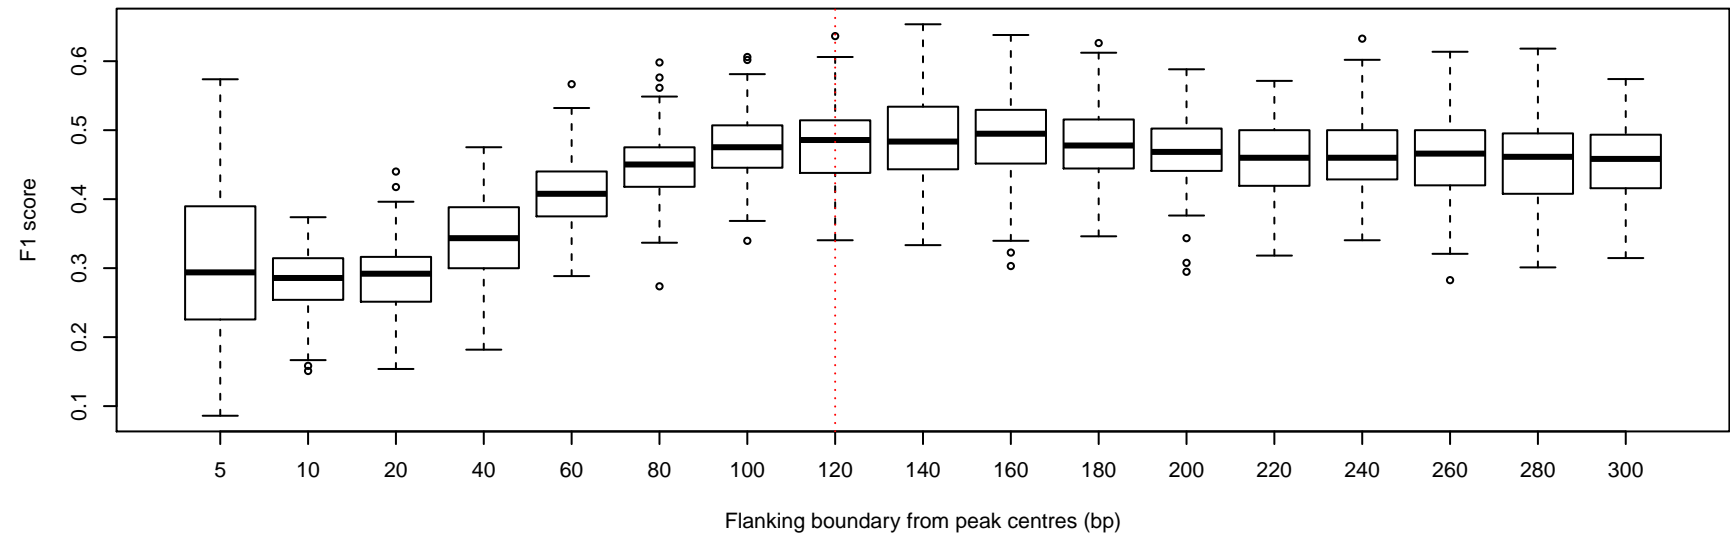

## HeLaS3

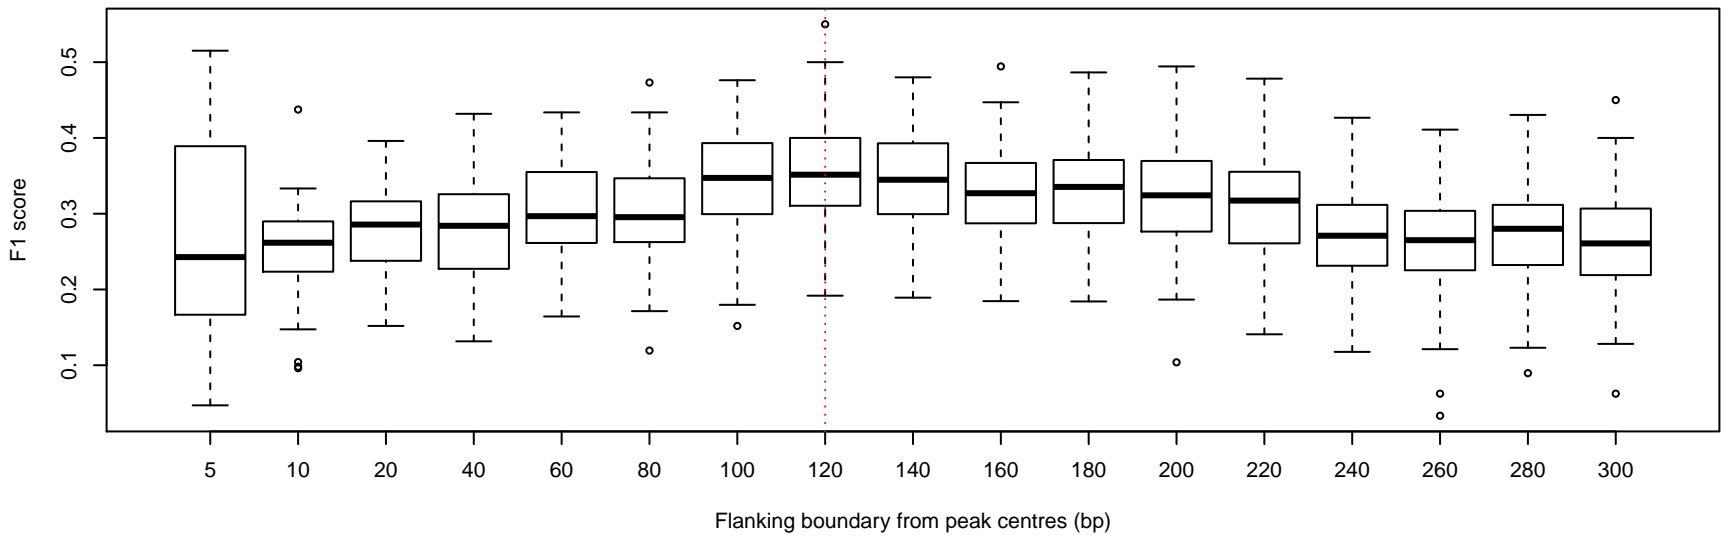

## HepG2

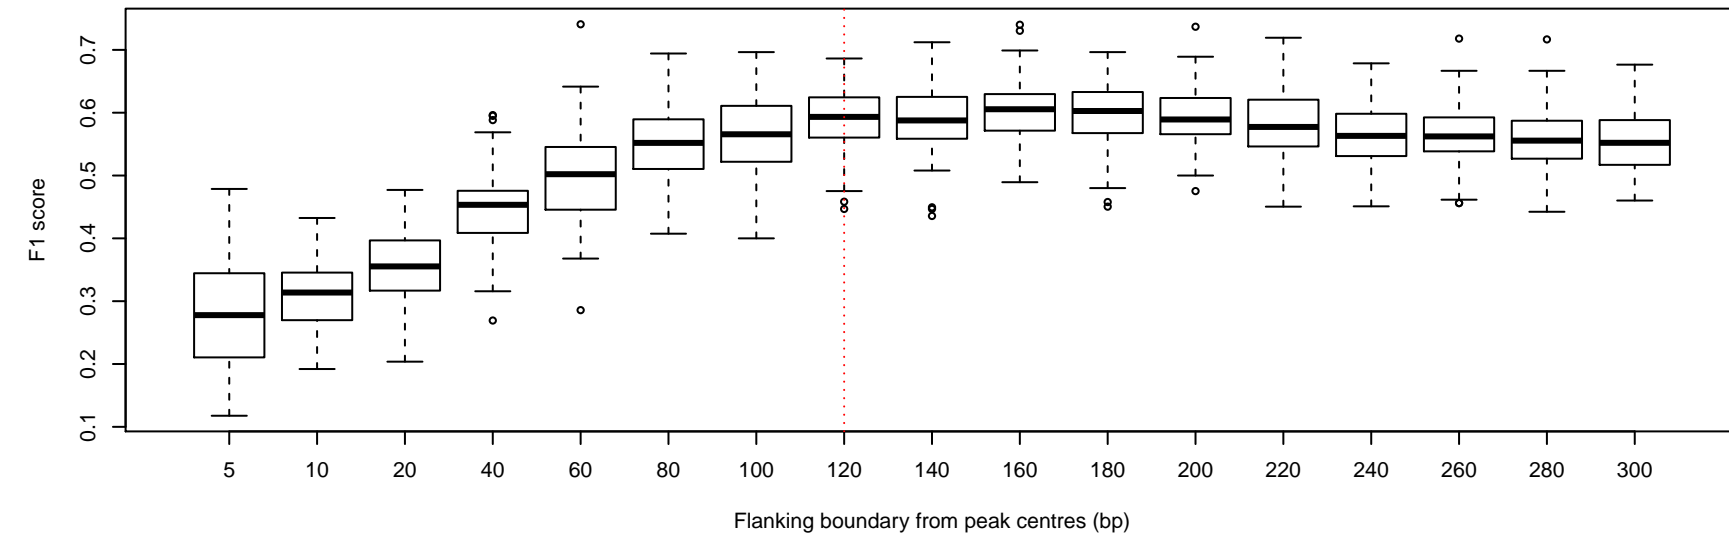

## K562

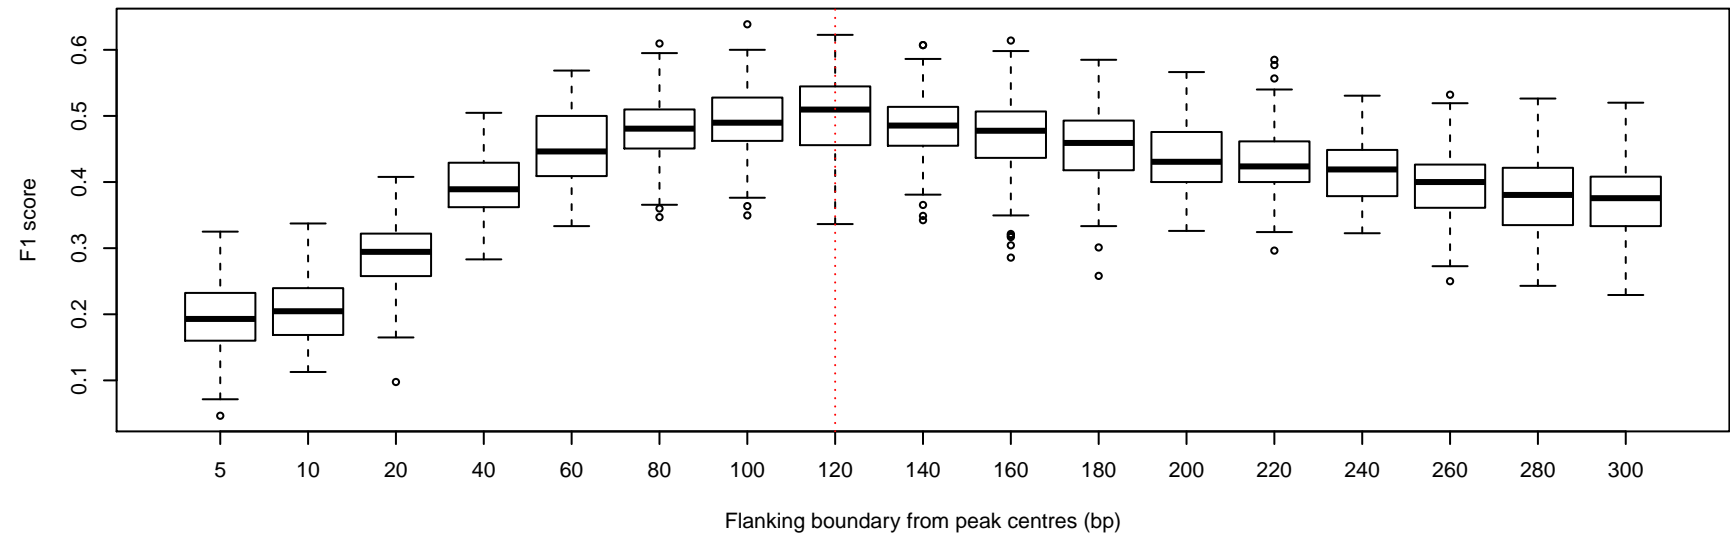

Supplement: 12864_2017_4340_MOESM3_ESM.pdf [file 12864_2017_4340_MOESM3_ESM.pdf]
