# Supplementary material for: Discovery of cell-type specific DNA motif grammar in cis-regulatory elements using random Forest
Source: PubMed Central journal article supplement (PMC5780765; doi:10.1186/s12864-017-4340-z), 2018-01-19

## Out of Bag (OOB) evaluation of RF of TCF7L2 dataset

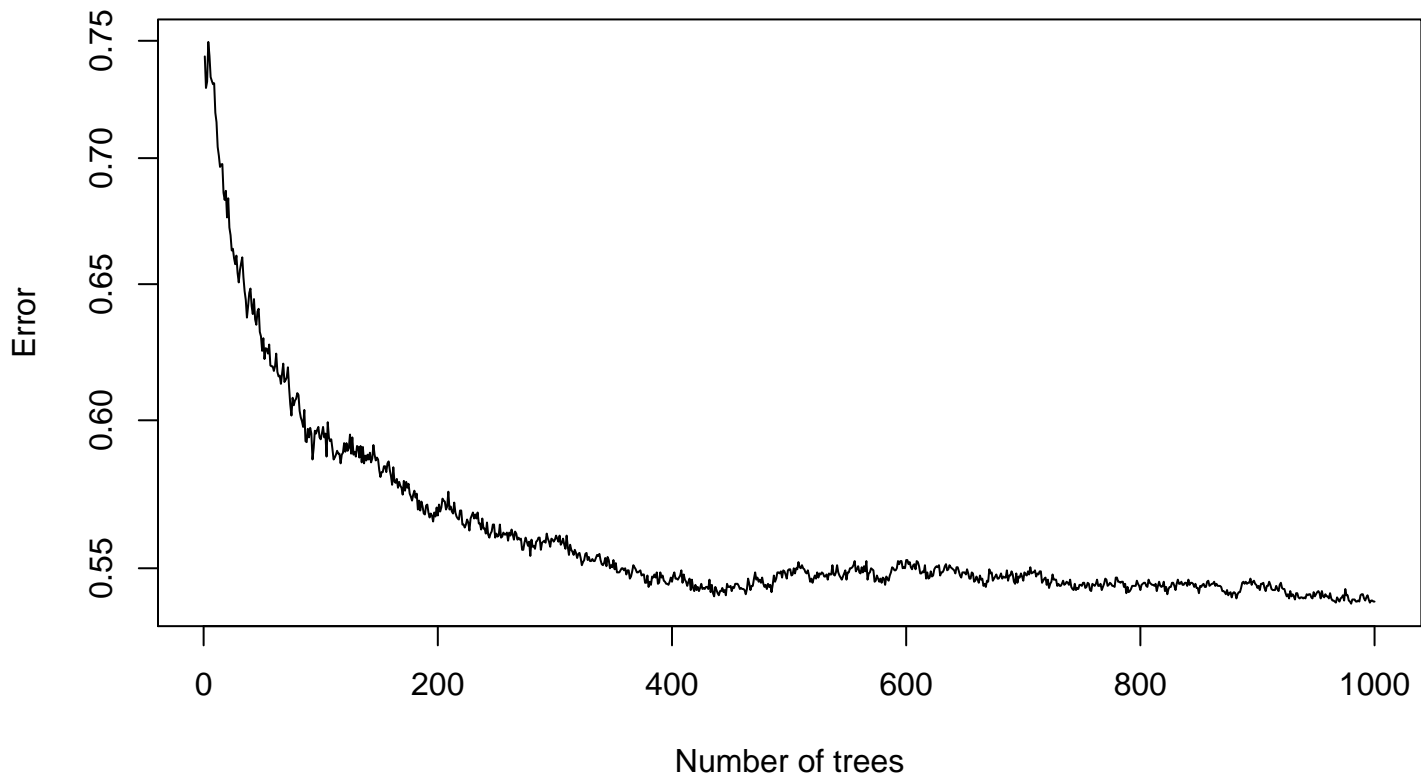

## Out of Bag (OOB) evaluation of RF of MAX dataset

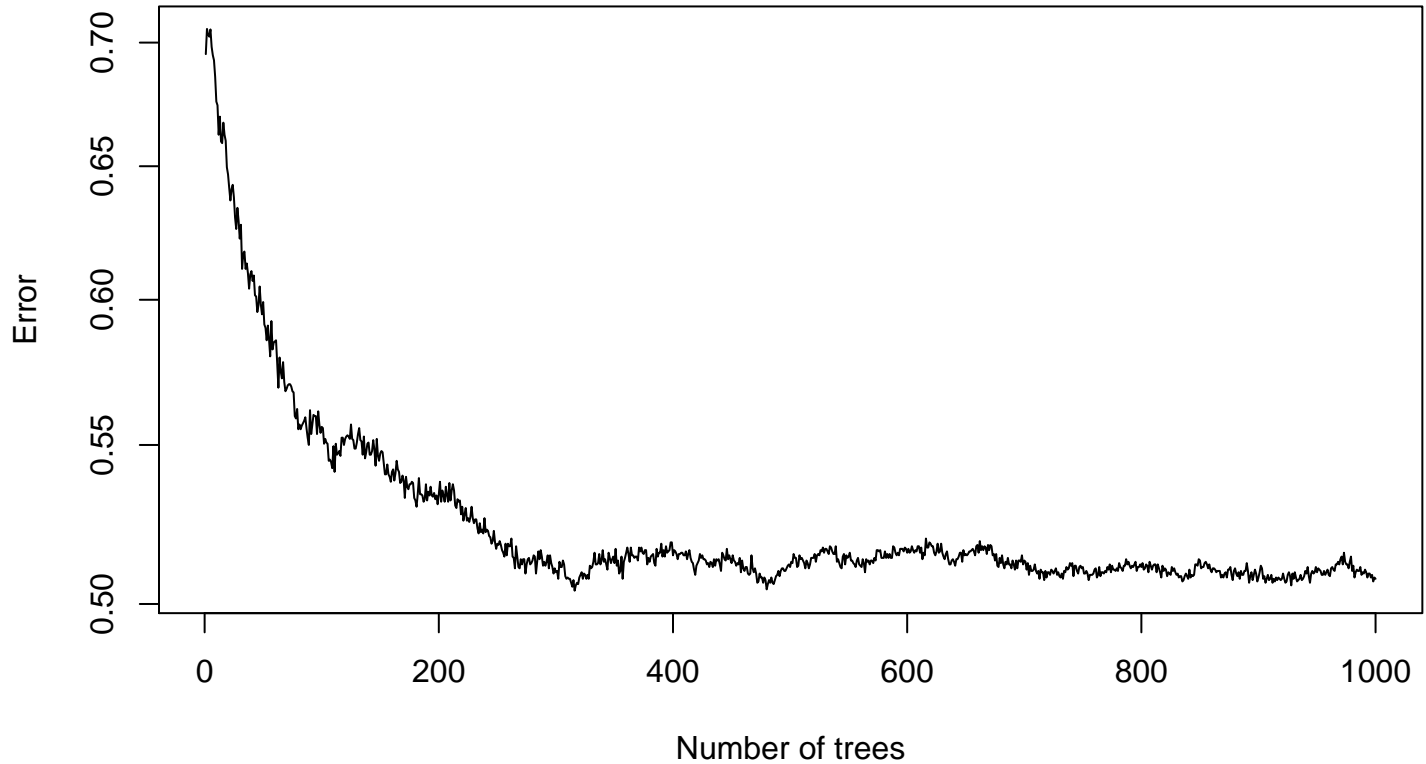

Supplement: 12864_2017_4340_MOESM5_ESM.pdf [file 12864_2017_4340_MOESM5_ESM.pdf]
